# Supplementary material for: Differential Expression of Polyamine Pathways in Human Pancreatic Tumor Progression and Effects of Polyamine Blockade on Tumor Microenvironment
Source: MDPI journal article supplement (doi:10.3390/cancers13246391), 2021-12-20
Supplement: s1 [file s1]

# Differential Expression of Polyamine Pathways in Human Pancreatic Tumor Progression and Effects of Polyamine Blockade on Tumor Microenvironment

Sai Preethi Nakkina <sup>1</sup>, Sarah B. Gitto <sup>2,3,4</sup>, , Veethika Pandey <sup>2,3,4</sup>, Jignesh G. Parikh <sup>5</sup>, Dirk Geerts <sup>6</sup>, Hans Carlo Maurer <sup>7</sup>, Kenneth P. Olive <sup>8,9</sup>, Otto Phanstiel IV <sup>10,\*</sup> and Deborah A. Altomare <sup>1,\*</sup>

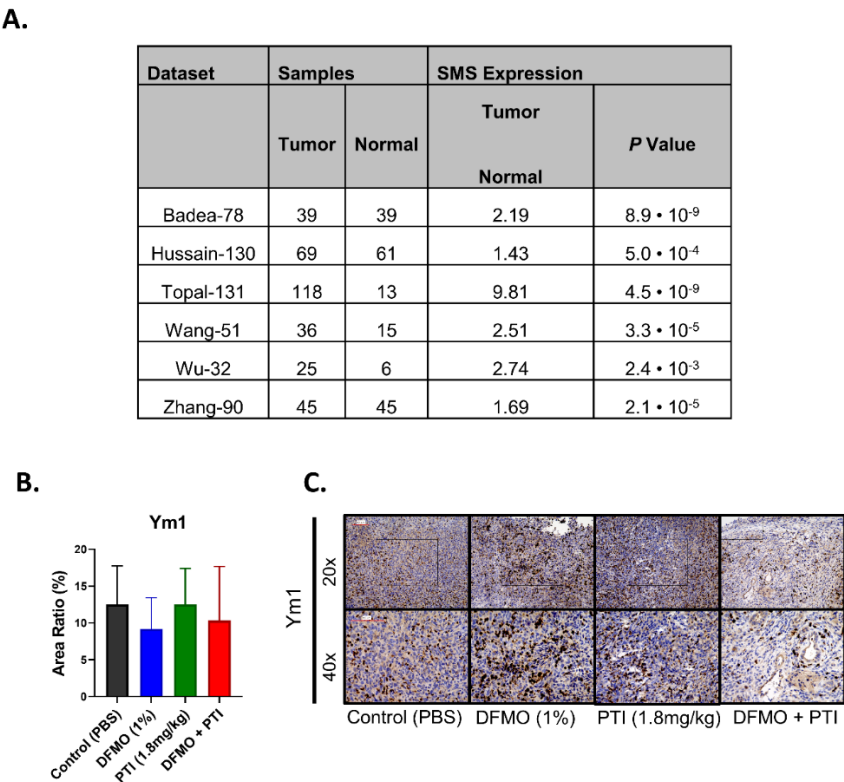

**Supplemental figure S1.** Spermine synthase expression in clinical pancreatic cancer samples and effects of polyamine blockade therapy on M2 macrophages in murine pancreatic cancer. (A) SMS mRNA expression in cancerous and normal pancreas tissue from six public mixed datasets. Kruskal-Wallis test was used for this comparison. (B) Quantification of Ym1 expression by IHC across treatment groups. (C) Immunohistochemistry images of Ym1 stained PBT-treated pancreatic tumor sections imaged at 20× and 40× magnification. 20× images contain inlays representing area captured at 40× magnification. Scale bars correspond to 100 μm.
